# Supplementary material for: A Critical Role of the Nuclear Receptor HR3 in Regulation of Gonadotrophic Cycles of the Mosquito Aedes aegypti
Source: PubMed Central journal article supplement (PMC3458863; doi:10.1371/journal.pone.0045019), 2012-09-26

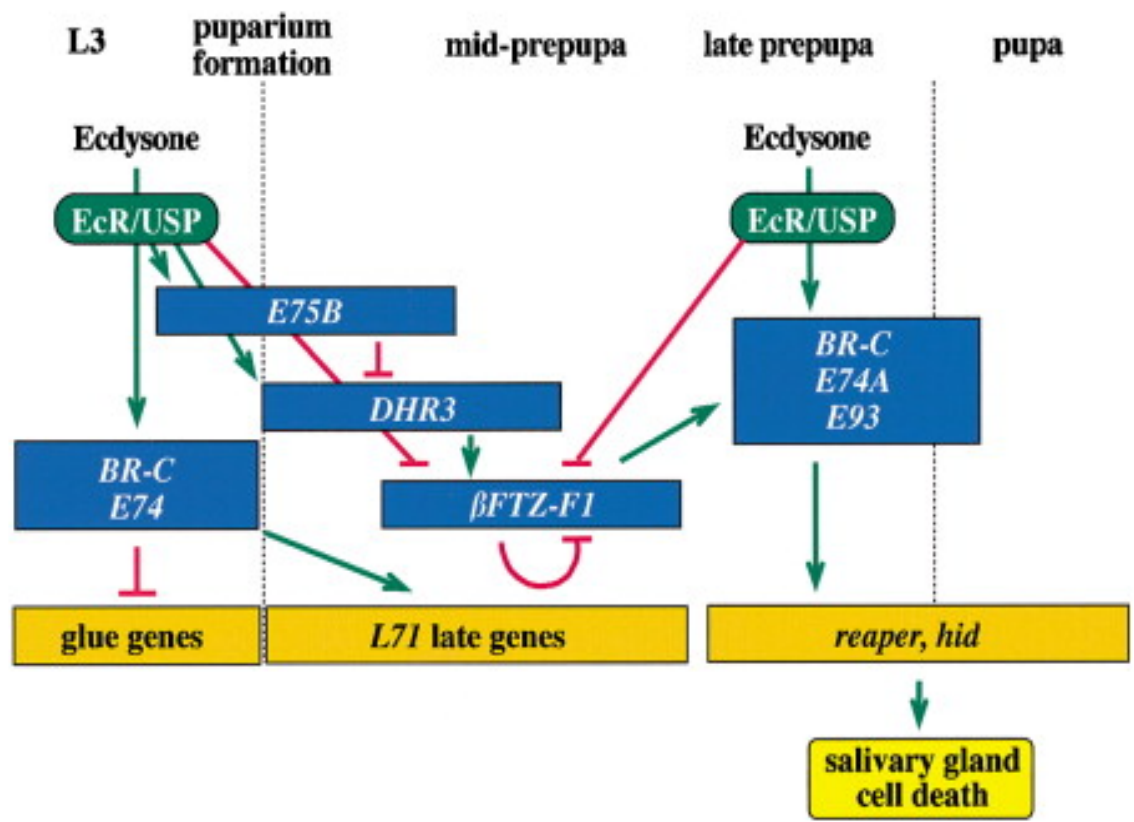

Supplement: pone.0045019.s001.pdf [file pone.0045019.s001.pdf]
